# Supplementary material for: Analysis of 44 Cases before the Landlord and Tenant Board Involving Bed Bug Infestations in Ontario, Canada: Focus on Adjudicator Decisions Based on Entomological/Pest Management Evidence and Accountability under the Residential Tenancy Act and Other Applicable Legislation
Source: MDPI journal article supplement (doi:10.3390/insects2030343), 2011-07-19
Supplement: s1 [file s1]

| NO     | CASE  | DATE | ADJUDICATOR | CLAIMANT | OUTCOME | LEGAL CLAIM                                                                              | AWARD                                                                       | CAUSE                                                                                                                                            | DETAIL CLAIM                                                                                                       | EVIDENCE                                                                                                                                                                                                          | PREP. ISSUE | CONTROL ISSUE | RENT ARREARS | EXPERT                                                                                           | MISSING?                                                                                                                                     | EVALUATION                                                                                                                                                                                                                   | APPRAISAL                                                                                                                                      | SCORE         | RATING (P/F) | EXPERT TYPE |                      |     |   |
|--------|-------|------|-------------|----------|---------|------------------------------------------------------------------------------------------|-----------------------------------------------------------------------------|--------------------------------------------------------------------------------------------------------------------------------------------------|--------------------------------------------------------------------------------------------------------------------|-------------------------------------------------------------------------------------------------------------------------------------------------------------------------------------------------------------------|-------------|---------------|--------------|--------------------------------------------------------------------------------------------------|----------------------------------------------------------------------------------------------------------------------------------------------|------------------------------------------------------------------------------------------------------------------------------------------------------------------------------------------------------------------------------|------------------------------------------------------------------------------------------------------------------------------------------------|---------------|--------------|-------------|----------------------|-----|---|
| 1      | 37735 | 2009 | E.FELLMAN   | T        | L       | MAINTENANCE DEFICIENCY                                                                   | 0                                                                           | ADJUDICATOR CONSIDERS LANDLORDS ACTIONS ADEQUATE. TENANT REFUSED SECOND TREATMENT CONSIDERED TO BE WITHIN STANDARDS                              | DAMAGES TO FURNITURE BY SPRAYING IT.                                                                               | PUBLIC HEALTH LEAD SPECIALIST INSPECTED UNIT. DIDN'T FIND ANY EVIDENCE                                                                                                                                            | 0           | 0             | 1            | LEAD PUBLIC HEALTH. CONFLICT OF INTEREST.                                                        | NO DETAILS OF TIME SPENT TREATING UNIT. NO MENTION OF ANY PREPARATION ISSUES.                                                                | THE FACT THAT THE LEAD SPECIALIST FROM PHN INSPECTED IS NOT PROOF THAT THERE IS NO INFESTATION. INAPPROPRIATE SPRAYING OF FURNITURE CREATED ANGST IN TENANT. REFUSED SECOND TREATMENT. SHOULD HAVE BEEN REIMBURSED FOR THIS. | FLAWED DECISION                                                                                                                                |               | 0            | F           | LPH                  |     |   |
|        |       |      | SCORE       |          |         |                                                                                          | 0                                                                           |                                                                                                                                                  | 0                                                                                                                  | 0                                                                                                                                                                                                                 | 0           | 0             | 0            | 0                                                                                                | 0                                                                                                                                            | 0                                                                                                                                                                                                                            |                                                                                                                                                |               | 0            | F           |                      |     |   |
| 2      | 79045 | 2009 | C.CLESLIE   | T        | T       | INTERFERENCE WITH ENJOYMENT                                                              | RENT ABATEMENT, COST OF PESTICIDES, MOVING COSTS                            | LANDLORD IGNORED ISSUE WHEN TENANT DID NOT REQUEST SECOND TREATMENT THEY HAD ADVISED TENANT TO "LET THEM KNOW WHEN READY" BUT NO OTHER FOLLOW-UP | TENANTS INITIALLY DID NOT ADVISE THE LANDLORD BUT TRIED TO HANDLE ALONE.                                           |                                                                                                                                                                                                                   | 0           | -1            | -1           | NO                                                                                               | NO EXPERT WITNESS TO ASSESS SITUATION                                                                                                        | ON BALANCE, SLANTED IN FAVOUR OF TENANTS.                                                                                                                                                                                    | LANDLORD ACCOUNTABILITY WAS THE MAIN FOCUS HERE. NOT UNREASONABLE, BUT TENANT ENDURANCE ACCEPTED, BUT NOT THAT OF LANDLORD                     |               |              | A           |                      |     |   |
|        |       |      | SCORE       |          |         |                                                                                          |                                                                             |                                                                                                                                                  | 1                                                                                                                  | 0                                                                                                                                                                                                                 | 1           | 0             | 0            | 0                                                                                                | 0                                                                                                                                            | 0                                                                                                                                                                                                                            |                                                                                                                                                |               | 3            | P           |                      |     |   |
| 3      | 86704 | 2009 | C.MINDAY    | T        | L       | MAINTENANCE DEFICIENCY - INTERFERENCE WITH ENJOYMENT                                     | 0                                                                           | CONSIDERED HABITABLE AND REASONABLE ACTIONS BY LANDLORD                                                                                          | INFESTED AT TIME OF MOVE-IN                                                                                        | STRONG BUT NOT USED PROPERLY                                                                                                                                                                                      | 0           | -1            | -1           | LANDLORD PEST FIRM BUT TESTIMONY WAS INCORRECT FACTUALLY                                         | TENANT DID NOT HAVE EXPERT                                                                                                                   | INCORRECT EVIDENCE BY FIRM'S TECHNICIAN SAYS DID NOT SPREAD BETWEEN UNITS, BUT MUST BE CARRIED. ADJUDICATOR CONSIDERED THIS COMMON AND THAT THE LANDLORD DID HIS BEST. VERY BAD DECISION                                     | FLAWED DECISION                                                                                                                                |               |              | F           | LPC                  |     |   |
|        |       |      | SCORE       |          |         |                                                                                          |                                                                             |                                                                                                                                                  | -1                                                                                                                 | -1                                                                                                                                                                                                                | -1          | 0             | 0            | -1                                                                                               | 0                                                                                                                                            | -1                                                                                                                                                                                                                           |                                                                                                                                                |               | -5           | F           |                      |     |   |
| 4      | 13731 | 2010 | I.VAN DELFT | T        | T       | HARASSMENT, BED BUG CLAIM WITHDRAWN                                                      | 0                                                                           | UNRELATED TO BED BUGS                                                                                                                            |                                                                                                                    |                                                                                                                                                                                                                   | 0           | 0             | 0            |                                                                                                  |                                                                                                                                              | PLED ON OTHER CLAIMS, WITHDRAWN                                                                                                                                                                                              |                                                                                                                                                |               |              | -5          | F                    | 0   |   |
| REVIEW |       |      | SCORE       |          |         |                                                                                          | 0                                                                           | 0                                                                                                                                                | 0                                                                                                                  | 0                                                                                                                                                                                                                 | 1           | 0             | 0            | 0                                                                                                | 0                                                                                                                                            | 0                                                                                                                                                                                                                            |                                                                                                                                                |               | 0            | N           |                      |     |   |
| 5      | 13735 | 2010 | G.BITTU     | T        | L       | MAINTENANCE DEFICIENCY, ENJOYMENT OF PROPERTY                                            | 0                                                                           | CASE NOT PROVEN. INSPECTIONS BY EXPERT                                                                                                           | 7200                                                                                                               | Nothing found in spite of inspections, but was treated at least 7 times. Preparation issues, but item about "moving mattress" is flawed.                                                                          | -1          | -1            | -1           | YES PEST CONTROL FIRM EXPERT DM                                                                  | NO DETAILS OF TIME SPENT TREATING UNIT. TREATING SO MANY TIMES WITHOUT EVIDENCE IS ILLEGAL AND POOR PRACTICE                                 | LANDLORD FIRM SEEMED MORE CREDIBLE THAN TENANT, BUT FLAWS IN HOW THIS WAS HANDLED. HOW MANY TIMES WAS UNIT PROPERLY PREPARED?                                                                                                | NOT A GOOD DECISION AS EVIDENCE WAS FLAWED. LANDLORD REPORT MORE CREDIBLE.                                                                     |               |              | 0           | N                    | LPC |   |
|        |       |      | SCORE       |          |         |                                                                                          | 0                                                                           |                                                                                                                                                  | 0                                                                                                                  | 0                                                                                                                                                                                                                 | -1          | 0             | 0            | 1                                                                                                | -1                                                                                                                                           | 1                                                                                                                                                                                                                            |                                                                                                                                                |               | 0            | F           |                      |     |   |
| 6      | 13782 | 2010 | L.MCMASTER  | T        | L       | MAINTENANCE                                                                              | 0                                                                           | CASE NOT PROVEN. INSPECTIONS BY EXPERT                                                                                                           | no amount mentioned                                                                                                | nothing found in spite of inspections, checked adjacent units                                                                                                                                                     |             |               |              | YES PEST CONTROL FIRM EXPERT DM                                                                  | might have been case of Delusory Parasitosis. But with bites at move-in. Curious for same PROOF NOT SUFFICIENT BUT SUBSTANTIAL               | LANDLORD AND THEIR FIRM WERE CREDIBLE. PROOF IS NOT DEFINITIVE.                                                                                                                                                              | FAIR DECISION                                                                                                                                  |               |              | 7           | LPC                  |     |   |
|        |       |      | SCORE       |          |         |                                                                                          | 0                                                                           |                                                                                                                                                  | 0                                                                                                                  | 0                                                                                                                                                                                                                 | -1          | 0             | 0            | 1                                                                                                | -1                                                                                                                                           | 1                                                                                                                                                                                                                            |                                                                                                                                                |               | 0            | F           |                      |     |   |
| 7      | 13809 | 2010 | V.CHONG     | T        | L       | MAINTENANCE                                                                              | 0                                                                           | NO OTHER REPORTED INFESTATIONS                                                                                                                   | 18500                                                                                                              | LANDLORD ACTED PROMPTLY. TENANT DID NOT PREPARE. NO OTHER REQUESTS                                                                                                                                                | -1          | 0             | 0            | PEST CONTROL FIRM FOR LANDLORD                                                                   | NO SOUND BASIS FOR REPORT OF NO OTHER INFESTATIONS. ADJACENT UNITS NOT CHECKED                                                               | TENANT CLAIMS WERE VAGUE AND NOT CONSIDERED VALID. SEEM TO BE DEFENSE AGAINST ARREARS                                                                                                                                        | FAIR DECISION                                                                                                                                  |               |              | 1           | LPC                  |     |   |
|        |       |      | SCORE       |          |         |                                                                                          | 0                                                                           |                                                                                                                                                  | 0                                                                                                                  | 0                                                                                                                                                                                                                 | -1          | 0             | 0            | 0                                                                                                | -1                                                                                                                                           | 1                                                                                                                                                                                                                            |                                                                                                                                                |               | 1            | P           |                      |     |   |
| 8      | 18631 | 2010 | M.SOO       | L        | L       | RENT ARREARS                                                                             | RENT ARREARS.                                                               | COUNTERCLAIM BY TENANT                                                                                                                           |                                                                                                                    | LANDLORD ACTED ON REPORT. TENANT DID NOT REQUEST SERVICE.                                                                                                                                                         | 0           | 0             | 0            | NO                                                                                               |                                                                                                                                              | TENANT CLAIMS WERE VAGUE AND NOT CONSIDERED VALID. SEEM TO BE DEFENSE AGAINST ARREARS.                                                                                                                                       | GOOD DECISION                                                                                                                                  |               |              | 2           | P                    | 0   |   |
|        |       |      | SCORE       |          |         |                                                                                          | 0                                                                           |                                                                                                                                                  | 0                                                                                                                  | 0                                                                                                                                                                                                                 | 1           | 0             | 0            | 0                                                                                                | 0                                                                                                                                            | 1                                                                                                                                                                                                                            |                                                                                                                                                |               | 2            | P           |                      |     |   |
| 9      | 37684 | 2010 | S.COLLINS   | T        | L       | MAINTENANCE INTERFERENCE WITH REASONABLE ENJOYMENT                                       | 0                                                                           | NO OTHER REPORTED INFESTATIONS                                                                                                                   | 700                                                                                                                | LANDLORD ACTED ON REPORT                                                                                                                                                                                          | 0           | 0             | 0            | NO                                                                                               | THE FACT THAT THERE HAVE NOT BEEN OTHER REQUESTS DOES NOT MEAN THAT THERE IS NO OTHER INVESTIGATION. NO REPORT OF ADJACENT UNIT INFESTATIONS | LANDLORD WAS CONSIDERING CHARGING TENANT COSTS OF TREATMENT, BUT THIS WAS REJECTED                                                                                                                                           | GOOD DECISION                                                                                                                                  |               |              |             |                      | 6   |   |
|        |       |      | SCORE       |          |         |                                                                                          |                                                                             |                                                                                                                                                  | 1                                                                                                                  | 0                                                                                                                                                                                                                 | 0           | 0             | 0            | 0                                                                                                | 0                                                                                                                                            | 1                                                                                                                                                                                                                            |                                                                                                                                                |               | 1            | P           |                      |     |   |
| 10     | 37785 | 2010 | G.SAVIDE    | T        | T       | MAINTENANCE DEFICIENCY - INTERFERENCE WITH ENJOYMENT. CAUSED TENANT TERMINATION OF LEASE | 2160                                                                        | REPLACEMENT OF DISPOSED FURNITURE ABATEMENT COSTS NO TERMINATION AS NOT CAUSED BY LANDLORD                                                       | INADEQUATE TREATMENT MEASURES CLAIMED (REPEATED TREATMENTS UNITS SUCCESS). EXTERMINATOR ADVISED TO THROW OUT ITEMS | ADJUDICATOR NOTED A LOT OF DETAILS OF WHAT HAPPENED                                                                                                                                                               | 0           | 1             | 1            | HAD ADVISED BY PEST CONTROL FIRM WITHOUT REPORT OF ANY PETS                                      | FLGS REPORTED BUT NO MENTION OF ANY PETS                                                                                                     | ADJUDICATOR GAVE THIS A LOT OF REFLECTION. BUT EVIDENCE THAT SECOND PEST CONTROL FIRM SAID IT WAS FREE OF BED BUGS WAS FLAWED. REFUSAL TO ALLOW TERMINATION OF TENANCY WAS FLAWED. BED BUGS WERE PRESENT AT MOVE IN...       |                                                                                                                                                |               |              | F           | LPC                  |     |   |
|        |       |      | SCORE       |          |         |                                                                                          | 0                                                                           |                                                                                                                                                  | 0                                                                                                                  | -1                                                                                                                                                                                                                | 1           | 0             | 0            | -1                                                                                               | -1                                                                                                                                           | -1                                                                                                                                                                                                                           |                                                                                                                                                |               | -3           | F           | LPC                  |     |   |
| 11     | 44231 | 2010 | G.TAYLOR    | T        | T       | INTERFERENCE ENJOYMENT                                                                   | RENT ABATEMENT AND LOSSES                                                   | INTERFERENCE ENJOYMENT                                                                                                                           | REBATE DAMAGES                                                                                                     | WEAK                                                                                                                                                                                                              |             |               |              | NO                                                                                               | DETAILED TREATMENT AND PREP                                                                                                                  |                                                                                                                                                                                                                              | SEEMS FAIR CONSIDERING EVIDENCE WAS                                                                                                            |               |              | 1           | P                    | 0   |   |
|        |       |      | SCORE       |          |         |                                                                                          |                                                                             |                                                                                                                                                  | 1                                                                                                                  | 1                                                                                                                                                                                                                 | 0           | 1             | 0            | 0                                                                                                | 0                                                                                                                                            | -1                                                                                                                                                                                                                           | 1                                                                                                                                              |               | 1            | P           |                      |     |   |
| 12     | 44277 | 2010 | L.MCMASTER  | L        | L       | RENT ARREARS                                                                             | ARREARS PLUS COSTS. 2009 ABATEMENT ENT                                      | DELAY IN TREATMENT                                                                                                                               | DELAY IN TREATMENT                                                                                                 | 2-3 WEEKS FROM REPORTED                                                                                                                                                                                           | 1           | 0             | 0            | NO                                                                                               |                                                                                                                                              | REASONABLE                                                                                                                                                                                                                   | GOOD DECISION                                                                                                                                  |               |              | 4           | P                    | 0   |   |
|        |       |      | SCORE       |          |         |                                                                                          |                                                                             |                                                                                                                                                  | 1                                                                                                                  | 1                                                                                                                                                                                                                 | 0           | 0             | 0            | 0                                                                                                | 0                                                                                                                                            | 1                                                                                                                                                                                                                            |                                                                                                                                                |               | 4            | P           |                      |     |   |
| 13     | 48718 | 2010 | S.COLLINS   | T        | T       | PREVIOUSLY INFESTED. MAINTENANCE ISSUES. DAMAGES FROM MICE. DELAY OF TREATMENT           | 2509 ABATEMENT EN COSTS (MICE DAMAGES, \$170) LEASE TERMINATED              | DELAY IN TREATMENT                                                                                                                               | 2509 ABATEMENT DAMAGES(MICE). LEASE TERMINATED                                                                     | DELAY IN TREATMENT FROM NOV TO JAN                                                                                                                                                                                | 0           | -1            | -1           | NO                                                                                               | NO                                                                                                                                           | POOR RESPONSE TO MICE AND BED BUGS. CLAIMS ADJUSTED                                                                                                                                                                          | GOOD DECISION. TOUGH ON NEW LANDLORD                                                                                                           |               |              |             |                      | 6   |   |
|        |       |      | SCORE       |          |         |                                                                                          |                                                                             |                                                                                                                                                  | 1                                                                                                                  | 1                                                                                                                                                                                                                 | 1           | 0             | 0            | 0                                                                                                | 0                                                                                                                                            | 1                                                                                                                                                                                                                            |                                                                                                                                                |               | 4            | P           |                      |     |   |
| 14     | 48769 | 2010 | L.STEVENS   | T        | L       | SUSPECTED BITES                                                                          | 0                                                                           | Possible Delusory Parasitosis                                                                                                                    | BITES. BED BUGS?                                                                                                   | NO BED BUGS FOUND BY HEALTH INSPECTOR, OR PEST CONTROL FIRM. SUGGESTION OF BODY LICE NONSENSE                                                                                                                     | -1          | 0             | 0            | THE EVIDENCE SUGGESTS THAT NEITHER THE HEALTH INSPECTOR OR PEST CONTROL OPERATOR WERE COMPETENT  | PROPER MONITORING INSPECTION. PROPER ID. OF FOUND INSECTS. ADDRESSING SUSPECTED D.P.P. WITH HEALTH UNIT                                      | INSPECTS SHOULD HAVE BEEN PROPERLY IN USE OF GLIMBUPS TO VALIDATE NO BED BUGS. GLUE TRAPS                                                                                                                                    | ADJUDICATOR ACTED AS WELL AS COULD BE EXPECTED WITHOUT UNDERSTANDING THE REAL ISSUE - DELUSORY PARASITOSIS                                     |               |              |             | LPC LPH              |     |   |
|        |       |      | SCORE       |          |         |                                                                                          |                                                                             |                                                                                                                                                  | 0                                                                                                                  | 0                                                                                                                                                                                                                 | -1          | 0             | 0            | -1                                                                                               | -1                                                                                                                                           | -1                                                                                                                                                                                                                           |                                                                                                                                                |               | -4           | F           |                      |     |   |
| 15     | 48882 | 2010 | E.SANDMUNAH | L        | L       | RENT ARREARS                                                                             | RENT ARREARS LESS 20% ABATEMENT FOR PERIOD BETWEEN REPORTING AND TREATMENT  | LANDLORD DELAYED TREATMENT. TENANT DID NOT CO-OPERATE FULLY                                                                                      | ARREARS VS BED BUGS                                                                                                | ISSUE OF NOTICE OF TREATMENT. PREPARATION INSTRUCTIONS.                                                                                                                                                           | 1           | -1            | -1           | 1                                                                                                | NO                                                                                                                                           | DETAILS OF PREPARATION                                                                                                                                                                                                       | FAIR ASSESSMENT. DID NOT REIMBURSE TENANT FOR CLAIMS OF DAMAGES TO MATTRESS OR BEDDING AS NO PROPER COST EVIDENCE SHOWN                        | FAIR DECISION |              |             | 3                    | P   | 0 |
|        |       |      | SCORE       |          |         |                                                                                          |                                                                             |                                                                                                                                                  | 0                                                                                                                  | 0                                                                                                                                                                                                                 | 1           | 0             | 0            | 0                                                                                                | 1                                                                                                                                            | 1                                                                                                                                                                                                                            |                                                                                                                                                |               | 3            | P           |                      |     |   |
| 16     | 58936 | 2010 | B.HOMENIUK  | T        | T       | RED BUGS. LANDLORD FAILED TO ACT AND IN BREACH OF MAINTENANCE                            | 50% RENT REBATE FROM FIRST REPORT OF INFESTATION                            | LANDLORD REFUSED TO ACCEPT UNIT WAS INFESTED. TENANT HARASSED BY LANDLORD AND STAFF.                                                             | FAILURE OF PROVIDING SERVICES                                                                                      | TENANT FOUND BED BUG. LANDLORD HIRED FIRM TO INSPECT. THEY DID NOT FIND ANY. TREATMENT REFUSED. TENANT FOLDING MORE INFESTATION. TENANT NOTIFIED OTHERS. LANDLORD ASKED TENANT TO MOVE OUT. TENANT HAPPY TO LEAVE | 0           | 0             | 1            | PEST CONTROL FIRM INCOMPETENT. IF TENANT FOUND ONE, AND WAS CONFIRMED, THEN SUFFICIENT EVIDENCE. | NO                                                                                                                                           | OVERALL FAIR JUDGEMENT. REFUSAL TO PAY FOR LOTION, STEAMER AND MATTRESS COVERS SEEMS UNFAIR AS LANDLORD REFUSED TO TREAT AT ALL                                                                                              | GENERALLY FAIR, EXCEPT FOR NOT PAYING FOR THE ITEMS TENANT BOUGHT TO DO SELF TREATMENT. THE FACT ITEMS WERE REUSABLE IS IRRELEVANT IN MY VIEW. |               |              | A           | LPC                  |     |   |
|        |       |      | SCORE       |          |         |                                                                                          |                                                                             |                                                                                                                                                  | 1                                                                                                                  | 1                                                                                                                                                                                                                 | 0           | 0             | 0            | -1                                                                                               | 0                                                                                                                                            | -1                                                                                                                                                                                                                           |                                                                                                                                                |               | 1            | P           |                      |     |   |
| 17     | 58958 | 2010 | V.CHONG     | T        | T       | RENT ABATEMENT, CLEANING                                                                 | AS REQUESTED                                                                | DELAY IN TREATMENT, LACK OF CONCERN                                                                                                              |                                                                                                                    | 1 WEEK DELAY IN ARRANGING TREATMENT                                                                                                                                                                               | 1           | 1             | 0            | NO                                                                                               | SOME FOLLOW-UP FOR SITE                                                                                                                      | FAIR JUDGEMENT                                                                                                                                                                                                               | FAIR DECISION                                                                                                                                  |               |              | 4           | P                    | 0   |   |
|        |       |      | SCORE       |          |         |                                                                                          |                                                                             |                                                                                                                                                  | 1                                                                                                                  | 0                                                                                                                                                                                                                 | 1           | 0             | 0            | 0                                                                                                | 1                                                                                                                                            | 1                                                                                                                                                                                                                            |                                                                                                                                                |               | 4            | P           |                      |     |   |
| 18     | 65536 | 2010 | L.MCMASTER  | T        | T       | RENT ABATEMENT, DUMPING OF FURNITURE, LAUNDRY, INSPECTOR                                 | 50% RENT ABATEMENT FROM FIRST REPORTED, COSTS OF LAUNDRY INSPECTOR TO CHECK | SOME DELAY IN TREATMENT. ASKED TENANT TO PAY HALF                                                                                                | NO IDENTIFICATION OF INSPECTION. QUANTIFICATION, SCOPE OF INSPECTION                                               |                                                                                                                                                                                                                   | -1          | 0             | 0            | YES, BUT NOT IDENTIFIED                                                                          | WERE THERE OTHER INFESTATIONS IN THE SITE, NO APPROPRIATE RECOMMENDATIONS TO PROTECT OTHERS                                                  | MOSTLY FAIR JUDGEMENT                                                                                                                                                                                                        | LACK OF CONFIRMED EXPERTISE. NO RECOMMENDATIONS FOLLOW-UP TO PROTECT OTHERS                                                                    |               |              |             | YES BUT UNKNOWN TYPE |     |   |
|        |       |      | SCORE       |          |         |                                                                                          |                                                                             |                                                                                                                                                  | 1                                                                                                                  | 0                                                                                                                                                                                                                 | 0           | 0             | 0            | 0                                                                                                | 0                                                                                                                                            | 1                                                                                                                                                                                                                            |                                                                                                                                                |               | 2            | P           |                      |     |   |
| 19     | 65642 | 2010 | C.CLESLIE   | T        | L       | HARASSMENT. WITHHOLDING OF SERVICE, BED BUGS                                             | 0                                                                           | CONFLICT BETWEEN TENANT AND LANDLORD                                                                                                             |                                                                                                                    | TENANT EVIDENCE NOT SUBSTANTIATED. LANDLORD COMPANY HAD LEGAL REP PLUS 4 PEOPLE PRESENT                                                                                                                           | 0           | 0             | 0            | NO                                                                                               | NO                                                                                                                                           | OBVIOUS BAD RELATIONS BETWEEN LANDLORD'S AGENTS AND TENANT                                                                                                                                                                   | BED BUGS NOT THE REAL FOCUS                                                                                                                    |               |              | 2           | P                    | 0   |   |
|        |       |      | SCORE       |          |         |                                                                                          |                                                                             |                                                                                                                                                  | 1                                                                                                                  | 0                                                                                                                                                                                                                 | 1           | 0             | 0            | 0                                                                                                | 0                                                                                                                                            | 0                                                                                                                                                                                                                            |                                                                                                                                                |               | 2            | P           |                      |     |   |

|    |       |      |             |    |    |                                                                                                                                                     |                                                              |                                                                                                                                                                                                                                                                                                          |                                                                                                                                                                |                                                                                                                                                                                                                       |   |   |   |    |                                                                                                                                                             |                                                                                                                             |                                                                                                                                                                                                                                                                                                                                            |                                                                                                                                               |                                |   |   |     |   |
|----|-------|------|-------------|----|----|-----------------------------------------------------------------------------------------------------------------------------------------------------|--------------------------------------------------------------|----------------------------------------------------------------------------------------------------------------------------------------------------------------------------------------------------------------------------------------------------------------------------------------------------------|----------------------------------------------------------------------------------------------------------------------------------------------------------------|-----------------------------------------------------------------------------------------------------------------------------------------------------------------------------------------------------------------------|---|---|---|----|-------------------------------------------------------------------------------------------------------------------------------------------------------------|-----------------------------------------------------------------------------------------------------------------------------|--------------------------------------------------------------------------------------------------------------------------------------------------------------------------------------------------------------------------------------------------------------------------------------------------------------------------------------------|-----------------------------------------------------------------------------------------------------------------------------------------------|--------------------------------|---|---|-----|---|
| 20 | 70677 | 2010 | L.HORTON    | T  | L  | RE-OPENED A MEDIATED AGREEMENT                                                                                                                      | GIVE ANOTHER TENANT LOST                                     | COMPLAINTS ABOUT VARIOUS ISSUES, BED BUGS ONLY A SIDE ISSUE                                                                                                                                                                                                                                              | MAINTENANCE AND INTERFERENCE                                                                                                                                   | ISSUES OF LAUNDRY CABINETS, T-LOST, PARKING, T-LOST, HANDLING OF GARBAGE, T-LOST, FLOODING, T-WON                                                                                                                     |   |   |   |    |                                                                                                                                                             | NOT REQUIRED                                                                                                                |                                                                                                                                                                                                                                                                                                                                            | BED BUGS ONLY A SIDE ISSUE                                                                                                                    | BED BUGS ADDED AS A SIDE ISSUE |   |   |     | 0 |
|    |       |      | SCORE       |    |    |                                                                                                                                                     |                                                              |                                                                                                                                                                                                                                                                                                          | 1                                                                                                                                                              | 1                                                                                                                                                                                                                     | 0 |   |   |    |                                                                                                                                                             | 0                                                                                                                           | 0                                                                                                                                                                                                                                                                                                                                          | 1                                                                                                                                             |                                | 3 | P |     | 0 |
| 21 | 76098 | 2010 | K.WALLACE   | T  | T  | LANDLORD FAILED TO MAINTAIN PROPERLY, PRIOR INFESTATION, DAMAGES TO MATTRESS, LEFT BEHIND                                                           | LOW RENT ABATEMENT, REPLACEMENT OF MATTRESS                  | LANDLORD KNEW UNIT WAS INFESTED, BUT CLAIMED NO RESPONSIBILITY TO INFORM AS WAS TREATED                                                                                                                                                                                                                  | TENANT CLAIMS TENANT STILL LIVED IN PREMISES                                                                                                                   | DETAILED EVIDENCE PRESENTED. LANDLORD CITED OTHER CASES, BUT AUDIATOR NOTED UNDER NO OBLIGATION TO FOLLOW THESE AND IN THESE CASES, LANDLORD NOT IN VIOLATION OF MAINTENANCE OBLIGATIONS, MAY HAVE BEEN TENANT        |   | 1 |   |    | LETTERS FROM PEST CONTROL COMPANY INDICATING PROBLEM NOT SOLVED AND OTHER UNITS (ADJACENT) ALSO INFESTED                                                    |                                                                                                                             | CONSIDERABLE AMOUNT OF EVIDENCE PRESENTED. AUDIATOR NOTED THAT EVEN IF TENANT BLAMELESS IN BEING UNABLE TO PAY RENT ARE STILL OBLIGED TO PAY IT, AND IN SIMILAR CONTEXT, EVEN IF LANDLORD IS BLAMELESS IN CAUSE OF INFESTATION, THEY ARE STILL RESPONSIBLE TO PROVIDE AN UNINFESTED UNIT TO NEW TENANT, AND TO SOLVE INFESTATION IN UNITS. | AUDIATOR VERY KNOWLEDGEABLE, AND INTERPRETED EVIDENCE VERY WELL IN RELATION TO CASE AND THE ACT.                                              |                                |   |   | UPC |   |
|    |       |      | SCORE       |    |    |                                                                                                                                                     |                                                              |                                                                                                                                                                                                                                                                                                          | 1                                                                                                                                                              | 1                                                                                                                                                                                                                     | 1 |   |   |    | 0                                                                                                                                                           | 0                                                                                                                           | 1                                                                                                                                                                                                                                                                                                                                          |                                                                                                                                               | 4                              | P |   | 0   |   |
| 22 | 76210 | 2010 | B.WALLACE   | T  | L  | FAILURE OF MAINTENANCE, LOSS OF ENDOWMENT DUE TO BED BUGS                                                                                           |                                                              | NO DIRECT EVIDENCE OF BED BUGS AFTER TREATMENT IN 2010                                                                                                                                                                                                                                                   | TENANT CLAIMS TREATMENT IN 2009 DIDN'T WORK. WALLS SHOULD HAVE BEEN OUTSITED                                                                                   | SEEMS ONLY ONE TREATMENT EACH TIME. 7 UNITS INFESTED IN 2010, THERE NO REPORTS                                                                                                                                        |   | 0 | 1 |    | ONLY PEST CONTROL FIRM, WORKING FOR LANDLORDS                                                                                                               | PRESUMPTION THAT PC INSPECTIONS WOULD ALWAYS VERIFY NO INFESTATION                                                          | PROBLEM RECURRING IN 7 UNITS BUT A LONG TIME SINCE ORIGINAL INFESTATION. WAS THE PROBLEM ACTUALLY SOLVED ORIGINALLY? REPORT NO OTHER COMPLAINTS SEEMS REMARKABLE CONSIDERING ONLY ONE TREATMENT EACH TIME                                                                                                                                  | TENANT FIRST THOUGHT SPIDERS, AND SUPER PROVIDED SPRAY. NOT A SOLUTION, AND NOT QUALIFIED. THEN SOME WEEKS UNTIL VERIFIED BED BUGS            |                                |   |   | UPC |   |
|    |       |      | SCORE       |    |    |                                                                                                                                                     |                                                              | 0                                                                                                                                                                                                                                                                                                        | 0                                                                                                                                                              | -1                                                                                                                                                                                                                    |   |   |   |    | 0                                                                                                                                                           | 0                                                                                                                           | -1                                                                                                                                                                                                                                                                                                                                         |                                                                                                                                               | -2                             | F |   | 0   |   |
| 23 | 76235 | 2010 | J.FELLMAN   | L  | LT | RENT ARREARS BY L. TENANT NOTED MAINTENANCE ISSUES, RECOMMENDATION BY HEALTH DEPT FOR SEALING TO PREVENT BED BUGS AND ROACHES DUE TO CHILD'S ASTHMA | 15% ABATEMENT TO TENANT. NOTICE OF EVICTION UNLESS RENT PAID | AS NOTED                                                                                                                                                                                                                                                                                                 |                                                                                                                                                                | CAREFULLY DETAILED.                                                                                                                                                                                                   |   | 0 | 1 | 1  | NOT REQUIRED                                                                                                                                                | NO                                                                                                                          | FAIR DECISION                                                                                                                                                                                                                                                                                                                              | BED BUGS AND MAINTENANCE AS ISSUES AGAINST RENT ARREARS. NOT MAIN ISSUE                                                                       |                                |   |   | 0   |   |
|    |       |      | SCORE       |    |    |                                                                                                                                                     |                                                              | 1                                                                                                                                                                                                                                                                                                        | 0                                                                                                                                                              | 1                                                                                                                                                                                                                     |   |   |   |    | 0                                                                                                                                                           | 0                                                                                                                           | 1                                                                                                                                                                                                                                                                                                                                          |                                                                                                                                               | 3                              | P |   | 0   |   |
| 24 | 79677 | 2010 | L.HORTON    | T  | LT | VARIOUS ISSUES. RENT ARREARS BED BUGS INCIDENTS SECOND CLAIM ORGANIC ISSUES                                                                         | SOME ABATEMENT. SCHEDULE TO REPAIR RENT                      | BED BUG ISSUE NOT ACCEPTED. RELATIVE TO HANDLING OF EXTERIOR GARBAGE DISPOSAL                                                                                                                                                                                                                            | VARIOUS                                                                                                                                                        | NOT CONSIDERED VALID IN RELATION TO BED BUGS                                                                                                                                                                          |   |   |   |    | NO                                                                                                                                                          | NO                                                                                                                          | FAIR DECISION                                                                                                                                                                                                                                                                                                                              | BED BUGS AND MAINTENANCE AS ISSUES AGAINST RENT ARREARS. NOT MAIN ISSUE                                                                       |                                |   |   | 0   |   |
|    |       |      | SCORE       |    |    |                                                                                                                                                     |                                                              | 1                                                                                                                                                                                                                                                                                                        | 0                                                                                                                                                              | 1                                                                                                                                                                                                                     |   |   |   |    | 0                                                                                                                                                           | 0                                                                                                                           | 1                                                                                                                                                                                                                                                                                                                                          |                                                                                                                                               | 3                              | P |   | 0   |   |
| 25 | 54    | 2009 | L.MOLAN     | T  | L  | BED BUGS. REASONABLE ENDOWMENT AND SUPPLYING NECESSARY SERVICES. SMALL AMOUNT                                                                       |                                                              | LANDLORD PROVIDED SPRAY AND DUST. AUDIATOR CONSIDERED THIS REASONABLE. OFFERED ANOTHER ROOM. TENANT REFUSED.                                                                                                                                                                                             | TO FUMIGATE POSSESSIONS, AND FOR ABATEMENT WHEN OUT OF ROOM                                                                                                    | OVERWHELMINGLY IN SUPPORT OF TENANT BROUGHT OTHER TENANTS' KNOWN INFESTATION.                                                                                                                                         |   | 0 | 1 | 1  | HEALTH INSPECTOR SAID COULD NOT HELP AS NUISANCE, NOT HEALTH ISSUE                                                                                          |                                                                                                                             | VERY POOR DECISION BY EVERY MEASURE. NO SUGGESTION OF PROFESSIONAL TREATMENT OF SITE. DECISION WAS IN 2007                                                                                                                                                                                                                                 | SEEMS NEITHER HEALTH INSPECTOR NOR THE AUDIATOR WERE COMPETENT IN THIS DECISION                                                               |                                |   |   | PH  |   |
|    |       |      | SCORE       |    |    |                                                                                                                                                     |                                                              | 1                                                                                                                                                                                                                                                                                                        | -2                                                                                                                                                             | -1                                                                                                                                                                                                                    |   |   |   |    | -1                                                                                                                                                          | 0                                                                                                                           | -1                                                                                                                                                                                                                                                                                                                                         |                                                                                                                                               | -5                             | F |   | 0   |   |
| 26 | 1714  | 2008 | D.LUFFING   | T  | TL | BED BUGS. REASONABLE ENDOWMENT. MAINTENANCE                                                                                                         | ABATEMENT FOR RENT AND DAMAGES                               | BED BUGS. INITIALLY IN UNIT. NOT REPORTED TO TENANT. FAILURE TO ACHIEVE CONTROL WITH PROFESSIONAL SERVICE.                                                                                                                                                                                               | FOR RENT. (DISMANTLE TENANT), FOR COST OF SOME INFESTED ITEMS                                                                                                  | CLAIMED IN SUPPORT OF TENANT                                                                                                                                                                                          |   |   | 1 |    | NO                                                                                                                                                          |                                                                                                                             | AUDIATOR CAREFULLY CONSIDERED THE TERMS OF THE LEASE AND REVIEWED EVIDENCE IN DETAIL OF CLAIM WITH CARE                                                                                                                                                                                                                                    | VERY FAIR. ONLY QUESTION IS KNOWLEDGE OF LANDLORD THAT THE UNIT WAS INFESTED.. NOT CLEAR                                                      |                                |   |   | 0   |   |
|    |       |      | SCORE       |    |    |                                                                                                                                                     |                                                              | 1                                                                                                                                                                                                                                                                                                        | 1                                                                                                                                                              | 1                                                                                                                                                                                                                     |   |   |   |    | 0                                                                                                                                                           | 0                                                                                                                           | 1                                                                                                                                                                                                                                                                                                                                          |                                                                                                                                               | 4                              | P |   | 0   |   |
| 27 | 1489  | 2009 | L.SANDMUNGH | T  | TL | BED BUGS                                                                                                                                            | COST OF TREATMENT                                            | APPROXIMATE BED BUGS BROUGHT INTO UNIT FROM DISCARDED HEADBOARD                                                                                                                                                                                                                                          | FOR TENANT TREATMENT COSTS BY HIRING FIRM. FAILURE TO CORRECT A MAINTENANCE ISSUE OF DAMAGES                                                                   | DETAILED EVIDENCE PRESENTED. HEADBOARD FROM INFESTED UNIT. TENANT'S COMPANY USED PRODUCT NOT REGISTERED FOR BED BUGS. AMATEURISH TREATMENT                                                                            |   | 0 | 1 |    | NO                                                                                                                                                          |                                                                                                                             | AUDIATOR REVIEWED EVIDENCE WITH CARE. REBATE OF 250 FOR LANDLORD FAILURE TO RESPOND TO MAINTENANCE ISSUE. NOTHING AWARDED FOR BED BUG ISSUE AS LANDLORD HAD PROVIDED SERVICE, AND TENANT BROUGHT IN INFESTATION. TENANT DID CONTROL. UNKNOWN                                                                                               | VERY FAIR. NOTHING AWARDED FOR BED BUG ISSUE AS LANDLORD HAD PROVIDED SERVICE, AND TENANT BROUGHT IN INFESTATION. TENANT DID CONTROL. UNKNOWN |                                |   |   | 0   |   |
|    |       |      | SCORE       |    |    |                                                                                                                                                     |                                                              | 1                                                                                                                                                                                                                                                                                                        | 1                                                                                                                                                              | 1                                                                                                                                                                                                                     |   |   |   |    | 0                                                                                                                                                           | 0                                                                                                                           | 1                                                                                                                                                                                                                                                                                                                                          |                                                                                                                                               | 4                              | P |   | 0   |   |
| 28 | 19858 | 2009 | T.TAYLOR    | LT | T  | BED BUGS. REASONABLE ENDOWMENT AND MAINTENANCE. TENANT, RENT ARREARS. LANDLORD                                                                      | ABATEMENT FOR HARASSMENT AND COSTS OF TREATMENT BY TENANT    | TREATMENT BY CONTRACTOR FAILED.                                                                                                                                                                                                                                                                          | AS NOTED                                                                                                                                                       | LANDLORD'S WITNESS (ANOTHER TENANT) NOTED NEED FOR REPAIRS/TREATMENTS THAT SUPPORTED TENANT'S CLAIM. FAILURE OF CONTROL. CONSIDERED LANDLORD FAILED TO LIMIT SPREAD IN BUILDING                                       |   | 0 | 1 | 1  | NO REAL EVALUATION OF STATUS IN THE BUILDING. LANDLORD EVIDENCE SEEMED WEAK.                                                                                | SOME DISPUTE ABOUT VALIDITY OF RECEIPT, BUT AUDIATOR HAD NO REASON TO QUESTION THIS. FAIR DECISION OVERALL.                 | FAIR DECISION. BUT NOTHING RELATED TO ONGOING PROBLEMS IN BUILDING. MISSED OPPORTUNITY BUT ONLY THIS CASE                                                                                                                                                                                                                                  |                                                                                                                                               |                                |   |   | 0   |   |
|    |       |      | SCORE       |    |    |                                                                                                                                                     |                                                              | 1                                                                                                                                                                                                                                                                                                        | 1                                                                                                                                                              | 1                                                                                                                                                                                                                     |   |   |   |    | 0                                                                                                                                                           | 0                                                                                                                           | 1                                                                                                                                                                                                                                                                                                                                          |                                                                                                                                               | 4                              | P |   | 0   |   |
| 29 | 67622 | 2010 | L.SANDMUNGH | T  | T  | INTERFERENCE WITH ENDOWMENT. FAILURE OF MAINTENANCE                                                                                                 | RENT ABATEMENT. HOTEL, COSTS OF SOME MATERIALS               | LANDLORD PEST CONTROL. CONTRACTOR FAILED TO CONTROL AFTER THREE TREATMENTS. CONFIRMED HEALTH DEPARTMENT INCOMPETENCY OF CONTRACTOR. INADEQUATE ACTIONS BY LANDLORD IN BUILDING IN GENERAL                                                                                                                | AS NOTED                                                                                                                                                       | TENANT DOCUMENTATION AND HEALTH DEPARTMENT INSPECTOR                                                                                                                                                                  |   | 0 | 1 | 1  | HEALTH INSPECTOR                                                                                                                                            | ANY FOLLOW UP ACTIONS BY HEALTH INSPECTOR. NOT APPARENT ON PART OF THIS... BUT AN IMPORTANT ELEMENT TO HELP RESOLVE ISSUES. | FAIR AUDIATOR. DID NOT GRANT TENANT ALL REQUESTS (TIME AWAY FROM WORK DUE TO BITE). NOT VERIFIED CLAIM FOR DAMAGES (ITEMS COULD HAVE BEEN TREATED). RENT ABATEMENT VARIED DUE TO TENANT NOT INFORMING LANDLORD OF INTENTION TO VACATE, THEREBY DELAYING HIS ABILITY TO TREAT UNIT                                                          | FAIR DECISION. CAREFULLY EVALUATED BY AUDIATOR                                                                                                |                                |   |   | TPH |   |
|    |       |      | SCORE       |    |    |                                                                                                                                                     |                                                              | 1                                                                                                                                                                                                                                                                                                        | 1                                                                                                                                                              | 1                                                                                                                                                                                                                     |   |   |   |    | 0                                                                                                                                                           | 0                                                                                                                           | 1                                                                                                                                                                                                                                                                                                                                          |                                                                                                                                               | 4                              | P |   | 0   |   |
| 30 | 78053 | 2009 | K.BUGBY     | TL |    | MAINTENANCE. T DAMAGES BY TENANT L                                                                                                                  | NIL                                                          | AUDIATOR DISMISSED BOTH CLAIMS. L. TENANT CLAIM AS LANDLORD DID TAKE REASONABLE ACTION IN SITE OF SINKING. TENANT TO SIGN AGREEMENT TO PAY FOR TREATMENT. DISMISSED LANDLORD CLAIM FOR DAMAGES (BED BUGS AS DAMAGES NOT DEFINED IN THIS WAY, BUT LANDLORD FREE TO SUE TENANT FOR THE COSTS IF THEY WISH. | LANDLORD ASKED TENANT TO AGREE TO PAY FOR SERVICES AS NO OTHER INFESTATION NEAR HER UNIT. AND UNLAWY BROUGHT IN. TENANT CLAIMED FOR RENT ABATEMENT AND DAMAGES | BASED ON EVIDENCE, NOT A PREEXISTING INFESTATION, AND APPARENTLY NOT RELATED TO ADJACENT UNITS.                                                                                                                       |   |   |   | NO | IN THIS CASE, LANDLORD IS OBLIGATED TO TREAT TO PROTECT OTHERS, BUT PROOF THAT IT IS TENANT'S FAULT? PERHAPS...                                             | FAIR DECISION OVERALL. ON WHAT BASIS WAS IT DETERMINED THAT ADJACENT UNITS ARE NOT INFESTED? WORD OF LANDLORD? PERHAPS      | FAIR DECISION OVERALL. JUST NEEDED MORE FACTUAL EVIDENCE THAT ADJACENT UNITS NOT INFESTED                                                                                                                                                                                                                                                  |                                                                                                                                               |                                |   |   | 0   |   |
|    |       |      | SCORE       |    |    |                                                                                                                                                     |                                                              | 1                                                                                                                                                                                                                                                                                                        | -1                                                                                                                                                             | 1                                                                                                                                                                                                                     |   |   |   |    | 0                                                                                                                                                           | 0                                                                                                                           | 1                                                                                                                                                                                                                                                                                                                                          |                                                                                                                                               | 2                              | P |   | 0   |   |
| 31 | 78485 | 2009 | B.GEORGE    | T  |    | FAILURE OF MAINTENANCE (BED BUGS)                                                                                                                   | NIL                                                          | SITE INFESTED, BUT TENANT ADVISED IN ADVANCE. MAJOR INFESTATION. CONSIDERABLE EFFORTS TO TREAT UNIT. TENANT AGREEMENT TO ALLOW DISPOSAL AS PART OF PREPARATION. RECEIVED ONTARIO WORKS GRANT                                                                                                             | TENANT CLAIMING FAILURE OF CONTROL AND OF DAMAGES AND LOSSES.                                                                                                  | 107 UNITS INFESTED. TENANT REQUESTING ALL UNITS IN COMPLEX BE TREATED. (500 UNITS). TENANT WANTED CARPETS REMOVED. LANDLORD COST OF TREATING HALLWAYS IS EXTREMELY EXAGGERATED UNLESS THIS INVOLVES MAJOR RENOVATION. |   | 1 | 1 | 0  | ONLY EXPERT IS FROM TREATMENT FIRM WHO APPARENTLY ALSO DO PREPARATION. UNIT NOT IDENTIFIED AS CLUTTERED OR HOARDING CASE. CONFLICTS IN TERMS OF POSSESSIONS | SITE HAS MAJOR INFESTATION. ABOUT 30% OF UNITS... REACHING TIPPING POINT. HOW MANY UNITS ADJACENT TO INFESTED UNITS         | COMPLEX CASE. AUDIATOR TOOK BEST JUDGEMENT UNDER CIRCUMSTANCES. PERHAPS SOME SUGGESTIONS OF MEDIATION MIGHT HAVE BEEN USEFUL RATHER THAN SIMPLE DISMISSAL.                                                                                                                                                                                 | DECISION REALLY DOES NOT MOVE THE SITUATION FORWARD. AUDIATOR COULD HAVE MADE SUGGESTIONS TO FORWARD THE SITUATION TO BENEFIT OF ALL.         |                                |   |   | UPC |   |
|    |       |      | SCORE       |    |    |                                                                                                                                                     |                                                              | 1                                                                                                                                                                                                                                                                                                        | 1                                                                                                                                                              | 1                                                                                                                                                                                                                     |   |   |   |    | -1                                                                                                                                                          | -1                                                                                                                          | 0                                                                                                                                                                                                                                                                                                                                          |                                                                                                                                               | 1                              | P |   | 0   |   |

|    |       |      |              |    |    |                                                                                               |                                                                              |                                                                                                                                                                                                                                                                                                                                                                                                                                                                                                                                                       |                                                                                                                                                    |                                                                                                                                                                                             |     |                                  |                                                                    |     |                                                               |                                                                          |                                                                                                                                                                                                                                                     |                                                                                                                                                                                                                                                                                                                                                                                                                                                 |                                                                                                                                    |    |     |    |     |  |
|----|-------|------|--------------|----|----|-----------------------------------------------------------------------------------------------|------------------------------------------------------------------------------|-------------------------------------------------------------------------------------------------------------------------------------------------------------------------------------------------------------------------------------------------------------------------------------------------------------------------------------------------------------------------------------------------------------------------------------------------------------------------------------------------------------------------------------------------------|----------------------------------------------------------------------------------------------------------------------------------------------------|---------------------------------------------------------------------------------------------------------------------------------------------------------------------------------------------|-----|----------------------------------|--------------------------------------------------------------------|-----|---------------------------------------------------------------|--------------------------------------------------------------------------|-----------------------------------------------------------------------------------------------------------------------------------------------------------------------------------------------------------------------------------------------------|-------------------------------------------------------------------------------------------------------------------------------------------------------------------------------------------------------------------------------------------------------------------------------------------------------------------------------------------------------------------------------------------------------------------------------------------------|------------------------------------------------------------------------------------------------------------------------------------|----|-----|----|-----|--|
| 32 | 79941 | 2009 | C KING       | TL | TL | RENT ARREARS, L. MAINTENANCE, T                                                               | OUTSTANDING RENT, MAINTENANCE, ABATEMENT OFFSET AGAINST COST FOR APPLICATION | UNIT INFESTED BUT TREATED. LOW LEVEL OF INFESTATION                                                                                                                                                                                                                                                                                                                                                                                                                                                                                                   | AS NOTED                                                                                                                                           | HEALTH INSPECTOR INDICATED LOW LEVEL INFESTATION DUE TO LITTLE EVIDENCE FOUND. DOCTOR SPOKE OF HOW THIS CAN STRESS PEOPLE. (CAN BE TREATED ON THIS COMMENT #8)                              | 0   | 1                                | 1                                                                  | 1   | HEALTH INSPECTOR                                              | MORE DIRECT PROOF OF LOW OR NO INFESTATION.                              | OVERALL FAIR.                                                                                                                                                                                                                                       | EVALUATION BY VISUAL INDICATED LOW OR NO, BUT NEED BETTER EVALUATION                                                                                                                                                                                                                                                                                                                                                                            |                                                                                                                                    |    | 1PH |    |     |  |
|    |       |      | SCORE        |    |    |                                                                                               |                                                                              | 1                                                                                                                                                                                                                                                                                                                                                                                                                                                                                                                                                     | 1                                                                                                                                                  | 1                                                                                                                                                                                           |     |                                  |                                                                    |     | 1                                                             | -1                                                                       | 1                                                                                                                                                                                                                                                   |                                                                                                                                                                                                                                                                                                                                                                                                                                                 | 4                                                                                                                                  | P  |     |    |     |  |
| 33 | 93933 | 2010 | J. BENOCHETS | L  | TL | RENT ARREARS VS BED BUG ISSUE                                                                 | ZERO ONE OFFSET OTHER                                                        | UNIT INFESTED PRIOR TO MOVE IN                                                                                                                                                                                                                                                                                                                                                                                                                                                                                                                        | AS NOTED                                                                                                                                           | LANDLORD TREATING UNIT. ILLEGAL. TENANT PROVIDED PHOTOS OF BITES. ADJUDICATOR DID NOT ACCEPT DOCTOR NOTE FULLY                                                                              | 0   | YES                              | YES                                                                | NO  | ADJUDICATOR UNWARE THAT LANDLORD IS NOT ALLOWED TO TREAT UNIT | OVERALL SEEMS FAIR HOWEVER, ADJUDICATOR NOT KNOWLEDGEABLE OF VIOLATIONS. | JUDGEMENT FAIR THOUGH ADJUDICATOR FAILED IN SOME AREAS                                                                                                                                                                                              |                                                                                                                                                                                                                                                                                                                                                                                                                                                 |                                                                                                                                    | 2  | P   |    |     |  |
|    |       |      | SCORE        |    |    |                                                                                               |                                                                              | 1                                                                                                                                                                                                                                                                                                                                                                                                                                                                                                                                                     | 1                                                                                                                                                  | 1                                                                                                                                                                                           |     |                                  |                                                                    |     | 0                                                             | -1                                                                       | 0                                                                                                                                                                                                                                                   |                                                                                                                                                                                                                                                                                                                                                                                                                                                 |                                                                                                                                    |    |     |    |     |  |
| 34 | 13413 | 2011 | J. ROZEMAL   | T  | L  | FAILURE TO MAINTAIN/ "ILLEGAL" RENT                                                           | 0                                                                            | THAT LANDLORD TOOK REASONABLE ACTION/ DID NOT CONSIDER CLAIMS OF LOSS. NO DETAILS                                                                                                                                                                                                                                                                                                                                                                                                                                                                     | AS NOTED. NO SPECIFICS OF LOSS OR OF PROBLEMS IN DECISION                                                                                          | TENANTS SAY WERE BITTEN AT START BUT DIDN'T KNOW FOR 4.5 MONTHS. REPORTED WERE TREATED, NOTHING MATCHED IN WRITING. REFUSED BED BUG DETECTION DOG                                           | NO  |                                  | TENANT REFUSED FURTHER TREATMENT DUE TO CONCERNING HEALTH OF CHILD | NO  | NO                                                            | NO                                                                       | TENANTS DID NOT APPEAR TO BE WELL ADVISED / NO ONE'S FAULT UNDER CURRENT LEGISLATION                                                                                                                                                                | IN CIRCUMSTANCES SEEMS LIKE A FAIR ADJUDICATION, BUT QUESTION OF WHETHER UNIT WAS INFESTED AT START. ON THE EVIDENCE SEEMS LANDLORD DIDN'T KNOW. SOME CONFLICT OF WHO IS TELLING TRUTH ABOUT WHO SAID WHAT AND WHEN. SHOULD HAVE BEEN IN WRITING.                                                                                                                                                                                               | NOTWITHSTANDING THE UNLIKELIHOOD OF UNIT BEING INFESTED PRIOR TO MOVE IN, ADJUDICATOR DID BEST THAT COULD BE DONE ON THE EVIDENCE. |    |     | 4  | P   |  |
|    |       |      | SCORE        |    |    |                                                                                               |                                                                              | 1                                                                                                                                                                                                                                                                                                                                                                                                                                                                                                                                                     | 1                                                                                                                                                  | 1                                                                                                                                                                                           |     |                                  |                                                                    |     | 0                                                             | 0                                                                        | 1                                                                                                                                                                                                                                                   |                                                                                                                                                                                                                                                                                                                                                                                                                                                 |                                                                                                                                    |    |     |    |     |  |
| 35 | 5939  | 2011 | A. WALLACE   | T  | T  | FAILURE TO MAINTAIN                                                                           | COST OF TREATMENT                                                            | ADJUDICATOR TOOK POSITION THAT IT IS THE LANDLORD'S OBLIGATION EVEN IF NOT THEIR FAULT. NO EVIDENCE THAT IT WAS TENANT'S FAULT TO STUDENT (HOUSING)                                                                                                                                                                                                                                                                                                                                                                                                   | LANDLORD WANTED TENANT TO PAY FOR TREATMENT. TENANT CONSIDERED THAT LANDLORD SHOULD PAY THE FULL AMOUNT                                            | TENANT ACTUALLY OFFERED TO SPLIT THE COSTS, SAID BUT AS LANDLORD REFUSED, THIS WAS NOT CONSIDERED A BINDING AGREEMENT, AND LANDLORD HAD TO PAY THE FULL AMOUNT                              | NO  | NO                               | NO                                                                 | NO  | NO                                                            | NO                                                                       | THE COST OF TREATMENT WAS CONSIDERABLE \$819.25. ADJUDICATOR WOULD NOT REQUIRE LANDLORD TO PAY FOR MATTRESS REPLACEMENT AS IT WAS OLD AND NEEDED REPLACEMENT IN ANY CASE.                                                                           | FAIR DECISION BUT HIGHLIGHTS NEEDED FOR EDUCATION, AS THE ISSUE OF FAULT WAS HIGH IN THIS CASE.                                                                                                                                                                                                                                                                                                                                                 |                                                                                                                                    |    | 4   | P  |     |  |
|    |       |      | SCORE        |    |    |                                                                                               |                                                                              | 1                                                                                                                                                                                                                                                                                                                                                                                                                                                                                                                                                     | 1                                                                                                                                                  | 1                                                                                                                                                                                           |     |                                  |                                                                    |     | 0                                                             | -1                                                                       | 1                                                                                                                                                                                                                                                   |                                                                                                                                                                                                                                                                                                                                                                                                                                                 |                                                                                                                                    |    |     |    |     |  |
| 36 | 26964 | 2011 | L. BOURGIGN  | L  | L  | RENT ARREARS                                                                                  | RENT AND COSTS                                                               | LANDLORD TOOK REASONABLE STEPS TO TRY TO TREAT FOR BED BUGS                                                                                                                                                                                                                                                                                                                                                                                                                                                                                           | TENANT REFUSED ENTRY. WANTED HEAT TREATMENT. LANDLORD REFUSED DUE TO COSTS. REFUSED TO ALLOW TECHNICIAN DUE TO PESTICIDES ON CLOTHES               | LANDLORD CLAIMED THAT HEALTH DEPARTMENT RECOMMENDS SPRAYING AS STANDARD TREATMENT. DID PAY TENANT TO RENT A STEAMER. NOT CLEAR WHAT KIND                                                    | NO  | YES                              | YES                                                                | NO  | NO                                                            | NO                                                                       | AN ALTERNATIVE COURSE OF TREATMENT, OR SHARING COSTS OF HEAT TREATMENT OR OF MEDICAL REASON FOR AVOIDING PESTICIDE                                                                                                                                  | UNDER THE CIRCUMSTANCES, SEEMS LIKE A FAIR EVALUATION BY ADJUDICATOR, NOT REALIZING THAT THERE COULD BE GROUNDS FOR ACCOMMODATION                                                                                                                                                                                                                                                                                                               | FAIR ADJUDICATION UNDER THE CIRCUMSTANCES                                                                                          |    |     | 3  | P   |  |
|    |       |      | SCORE        |    |    |                                                                                               |                                                                              | 1                                                                                                                                                                                                                                                                                                                                                                                                                                                                                                                                                     | 1                                                                                                                                                  | 1                                                                                                                                                                                           |     |                                  |                                                                    |     | 0                                                             | -1                                                                       | 1                                                                                                                                                                                                                                                   |                                                                                                                                                                                                                                                                                                                                                                                                                                                 |                                                                                                                                    |    |     |    |     |  |
| 37 | 13481 | 2011 | E. FLUFFA    | T  | T  | FAILURE TO MAINTAIN                                                                           | COST OF FILING                                                               | LANDLORD DID NOT SOLVE PROBLEM                                                                                                                                                                                                                                                                                                                                                                                                                                                                                                                        | TENANT DID MAKE CLAIMS OF LOSS, BUT NOT IN EVIDENCE                                                                                                | ADJUDICATOR REPORT DOES NOT OUTLINE DETAILS. BUT JUST SAYS THAT CLAIMS ARE NOT JUSTIFIED. TENANT CLAIM OF NO RESPONSE BY LANDLORD SINCE 2008 CONSIDERED AN EXAGGERATION BUT NO REASONS WHY. | NO  | YES                              | IN TRUST TO LTR                                                    | NO  | NO                                                            | NO                                                                       | UNLIKE MOST ADJUDICATORS, DID NOT OUTLINE DETAILS OF REASONS FOR SOME OF THE DECISIONS.                                                                                                                                                             | ORDER TO CORRECT PROBLEM, BUT THERE IS REALLY VERY LITTLE EVIDENCE PRESENTED ON THE SITUATION.                                                                                                                                                                                                                                                                                                                                                  | SEEMS WEAK OTHER THAN ORDER FOR LANDLORD TO CORRECT THE PROBLEM, BUT EVIDENCE IS MISSING.                                          |    |     | -3 | F   |  |
|    |       |      | SCORE        |    |    |                                                                                               |                                                                              | 1                                                                                                                                                                                                                                                                                                                                                                                                                                                                                                                                                     | -1                                                                                                                                                 | -1                                                                                                                                                                                          |     |                                  |                                                                    |     | 0                                                             | -1                                                                       | -1                                                                                                                                                                                                                                                  |                                                                                                                                                                                                                                                                                                                                                                                                                                                 |                                                                                                                                    |    |     |    |     |  |
| 38 | 13438 | 2011 | M. SOO       | L  | L  | RENT ARREARS                                                                                  | RENT AND COSTS                                                               | LANDLORD TREATED UNIT WITH HEAT TREATMENT AND PROVIDED ABATEMENT FOR THREE MONTHS                                                                                                                                                                                                                                                                                                                                                                                                                                                                     | TENANT WANTED RENT ABATEMENT FOR ENTIRE TIME UNIT WAS INFESTED AND DAMAGES TO TWO TELEVISIONS, BUT ADMITTED THEY STILL WORKED AND WERE OLD         | ADJUDICATOR REPORT DOES NOT OUTLINE DETAILS. BUT JUST SAYS THAT CLAIMS ARE NOT JUSTIFIED. TENANT CLAIM OF NO RESPONSE BY LANDLORD SINCE 2008 CONSIDERED AN EXAGGERATION BUT NO REASONS WHY. | NO  | CLAIMED UNIT INFESTED AT MOVE IN | YES                                                                | NO  | NO                                                            | NO                                                                       | LANDLORD TOOK CONSIDERABLE STEPS TO TREAT UNIT. ISSUE OF INFESTATION AT MOVE IN WAS REGRETTABLE BUT LANDLORD PAID ABATEMENT                                                                                                                         | FAIR EVALUATION                                                                                                                                                                                                                                                                                                                                                                                                                                 |                                                                                                                                    |    | 4   | P  |     |  |
|    |       |      | SCORE        |    |    |                                                                                               |                                                                              | 1                                                                                                                                                                                                                                                                                                                                                                                                                                                                                                                                                     | 1                                                                                                                                                  | 1                                                                                                                                                                                           |     |                                  |                                                                    |     | 0                                                             | 0                                                                        | 1                                                                                                                                                                                                                                                   |                                                                                                                                                                                                                                                                                                                                                                                                                                                 |                                                                                                                                    |    |     |    |     |  |
| 39 | 27370 | 2011 | A. WALLACE   | T  | L  | "ILLEGAL" RENT                                                                                | 0                                                                            | REQUESTED ABATEMENT BUT DID NOT FILE CORRECTLY                                                                                                                                                                                                                                                                                                                                                                                                                                                                                                        | BED BUGS IN UNIT                                                                                                                                   | ADJUDICATOR FOLLOWING PROCEDURES, BUT NOT ADDRESSING BED BUG ISSUE AT ALL                                                                                                                   | NO  | YES                              | NO                                                                 | NO  | NO                                                            | DISMISSED ON A TECHNICALITY                                              | TOO BAD ADJUDICATOR DIDN'T FACILITATE CORRECT TREATMENT FOR MAINTENANCE APPLICATION                                                                                                                                                                 |                                                                                                                                                                                                                                                                                                                                                                                                                                                 |                                                                                                                                    | -1 | F   |    |     |  |
|    |       |      | SCORE        |    |    |                                                                                               |                                                                              | 1                                                                                                                                                                                                                                                                                                                                                                                                                                                                                                                                                     | -1                                                                                                                                                 | -1                                                                                                                                                                                          |     |                                  |                                                                    |     | 0                                                             | 0                                                                        | -1                                                                                                                                                                                                                                                  |                                                                                                                                                                                                                                                                                                                                                                                                                                                 |                                                                                                                                    |    |     |    |     |  |
| 40 | 34430 | 2011 | L. BOURGIGN  | LT | L  | LANDLORD, RENT ARREARS, TENANT, MAINTENANCE                                                   | RENT AND COSTS                                                               | TENANT DID NOT PAY RENT ALTHOUGH ORDERED TO DO SO. TENANT LODGED MAINTENANCE CLAIM AFTER LANDLORD CLAIM                                                                                                                                                                                                                                                                                                                                                                                                                                               | TENANT UNCOOPERATIVE AND DID NOT FOLLOW ORDERS OF LTR                                                                                              | REPORT BY HEALTH DEPARTMENT PROVIDED BY TENANT INDICATED UNIT HAD BEEN TREATED AND TENANT ADVISED TO ASK FOR FOLLOW UP.                                                                     | NO  | NOT CLEAR                        | YES                                                                | YES | NO                                                            | NO                                                                       | BASIC ISSUE WAS NON PAYMENT OF RENT. DETAILS OF BED BUG ISSUE WERE REALLY NOT THERE                                                                                                                                                                 | FAIR UNDER CIRCUMSTANCES                                                                                                                                                                                                                                                                                                                                                                                                                        |                                                                                                                                    |    | 5   | P  | TPH |  |
|    |       |      | SCORE        |    |    |                                                                                               |                                                                              | 1                                                                                                                                                                                                                                                                                                                                                                                                                                                                                                                                                     | 1                                                                                                                                                  | 1                                                                                                                                                                                           |     |                                  |                                                                    |     | 1                                                             | 0                                                                        | 1                                                                                                                                                                                                                                                   |                                                                                                                                                                                                                                                                                                                                                                                                                                                 |                                                                                                                                    |    |     |    |     |  |
| 41 | 13390 | 2011 | P. GUZINA    | T  | T  | MAINTENANCE/DAMAGES, HOTEL                                                                    | HOTEL ROOM AND COSTS                                                         | UNIT INFESTED. FEMALE TENANT PREGNANT AND HAS TO BE OUT OF UNIT                                                                                                                                                                                                                                                                                                                                                                                                                                                                                       | TENANT CLAIMED COMPLAINTING FOR MORE THAN A YEAR. CLAIM FOR ALL FURNITURE AND POSSESSIONS, AND HOTEL ROOM                                          | NO DETAILS ON SPECIFICS OF INFESTATION, BUT UNIT WAS TREATED TWICE.                                                                                                                         | NO  | YES                              | NO                                                                 | YES | NO                                                            | NO                                                                       | FAIR. COSTS OF HOTEL ROOM. THE RECOMMENDATION FOR PREGNANT WOMEN TO VACATE DOES NOT USUALLY OBLIGATE LANDLORD. ISSUE OF FAULT AS OPPOSED TO OBLIGATION                                                                                              | FAIR... DID NOT ORDER PAYMENT FOR FURNITURE AND POSSESSIONS                                                                                                                                                                                                                                                                                                                                                                                     | FAMILY DOCTOR TREATING FOR BED BUG BITES                                                                                           |    |     | 3  | P   |  |
|    |       |      | SCORE        |    |    |                                                                                               |                                                                              | 1                                                                                                                                                                                                                                                                                                                                                                                                                                                                                                                                                     | 1                                                                                                                                                  | 0                                                                                                                                                                                           |     |                                  |                                                                    |     | 0                                                             | 0                                                                        | 1                                                                                                                                                                                                                                                   |                                                                                                                                                                                                                                                                                                                                                                                                                                                 |                                                                                                                                    |    |     |    |     |  |
| 42 | 5965  | 2011 | A. CAREY     | L  | 0  | INTERFERENCE OF LANDLORD OR OTHER TENANT                                                      | 0                                                                            | TENANT WOULD NOT PREPARE UNIT FOR TREATMENT                                                                                                                                                                                                                                                                                                                                                                                                                                                                                                           | TENANT REFUSED TO PREPARE UNIT FOR TREATMENT ON 4 OCCASIONS                                                                                        | NOTICE OF TERMINATION GIVEN, AND TENANT MUST COMPLY, BUT LANDLORD DID NOT ATTEMPT TO TREAT DURING THE PERIOD                                                                                | YES | YES                              | NO                                                                 | NO  | NO                                                            | NO                                                                       | THIS FELT TO A LEGAL DETAIL. LANDLORD FAILED TO TRY TO TREAT, THEREFORE NOTICE OF TERMINATION WAS ISSUED.                                                                                                                                           | TECHNICALLY AS PROBLEM IS STILL THERE AND NOTHING IN THE ADJUDICATION PROVIDES SUPPORT TO TENANT OR A PROCESS TO PREPARE. HENCE 4 ON ACTION IN RELATION TO DETAIL CLAIM                                                                                                                                                                                                                                                                         |                                                                                                                                    |    | 0   | F  |     |  |
|    |       |      | SCORE        |    |    |                                                                                               |                                                                              | 1                                                                                                                                                                                                                                                                                                                                                                                                                                                                                                                                                     | -1                                                                                                                                                 | 1                                                                                                                                                                                           |     |                                  |                                                                    |     | 0                                                             | 0                                                                        | -1                                                                                                                                                                                                                                                  |                                                                                                                                                                                                                                                                                                                                                                                                                                                 |                                                                                                                                    |    |     |    |     |  |
| 43 | 27139 | 2011 | A. CAREY     | L  | L  | INTERFERENCE WITH LANDLORD AND OTHER TENANTS, ILLEGAL ACTIVITY, LACK OF CO-OPERATION          | END OF TENANCY, COSTS                                                        | TENANT REFUSED TREATMENT AND DID NOT CO-OPERATE, BUT WAS LATER CO-OPERATIVE. THIS WAS THEREFORE NOT THE MAIN REASON FOR THE TERMINATION OF TENANCY                                                                                                                                                                                                                                                                                                                                                                                                    | TENANT REFUSED TREATMENT AND DID NOT CO-OPERATE, BUT WAS LATER CO-OPERATIVE. THIS WAS THEREFORE NOT THE MAIN REASON FOR THE TERMINATION OF TENANCY | TENANT ON OSGP, BUT MANY ISSUES                                                                                                                                                             | YES | NO                               | NO                                                                 | TPH | NO                                                            | NO                                                                       | COMPLEX CASE. BED BUG ISSUE ONLY A SMALL PART OF THIS. WAS HANDLED APPROPRIATELY IN RELATION TO THE EVICTION/TERMINATION ORDER, AND WAS EXCLUDED IN ORDER.                                                                                          | HANDLED AS WELL AS COULD BE EXPECTED. CONSIDERING THE COMPLEXITIES UNRELATED TO PEST INFESTATIONS.                                                                                                                                                                                                                                                                                                                                              |                                                                                                                                    |    | 5   | P  | PH  |  |
|    |       |      | SCORE        |    |    |                                                                                               |                                                                              | 1                                                                                                                                                                                                                                                                                                                                                                                                                                                                                                                                                     | 1                                                                                                                                                  | 1                                                                                                                                                                                           |     |                                  |                                                                    |     | 1                                                             | 0                                                                        | 1                                                                                                                                                                                                                                                   |                                                                                                                                                                                                                                                                                                                                                                                                                                                 |                                                                                                                                    |    |     |    |     |  |
| 44 | 13399 | 2011 | S. COLLINS   | L  | TL | RENT ARREARS BY LANDLORD, TENANT MISSED ISSUES OF ILLEGAL ENTRY, LOSS DUE TO DEFECTIVE FRIDGE | RENT ARREARS VS BED BUG ISSUE                                                | TENANT LEFT WITH CHILDREN. UNIT NOT TREATED. LANDLORD CLAIMS NOT PREPARED PROPERLY. BED COVERED IN PLASTIC (INWY). TENANT SAY DID NOT BRING INFESTATION. REPORTS OF INFESTATION IN BUILDING. REPORTED ROACHES IN COMMON HALLWAY. LANDLORD BATS CLEANED IN HALLWAYS. DEAD MICE IN UNIT. LANDLORD GIVES TRAPS TO TENANTS WHO ASK. SOME OF LANDLORD COMMANDS VERY WEAK. ("TESTIFIED THAT FEMALE TENANT DIDN'T COMPLAIN ABOUT MICE ONLY THAT SHE FOUND A COUPLE OF DEAD MICE. TENANT REPORTED HEARING BABY MICE IN KITCHEN. LANDLORD ADVISED TO "VACUUM". | VARIOUS ITEMS. TENANT CLAIMS INFESTED AT MOVE IN. DISPUTED. LOST COUCH. FOOD LOGGERS                                                               | LANDLORD SCHEDULED TREATMENT, BUT UNIT NOT PREPARED.                                                                                                                                        | YES | YES                              | YES                                                                | NO  | NO                                                            | NO                                                                       | LOSS CLAIMS HANDLED FAIRLY, BUT CONSIDERING THAT THERE WAS INDICATION OF ROACH AND MOUSE INFESTATIONS, IT IS NOT UNLIKELY THAT THE TENANT'S CLAIMS OF INFESTATION AT MOVE IN WERE REASONABLE. THE FACT THAT A NEWBORN ARRIVED TO TENANT WAS MEAGER. | THE ADJUDICATOR CONSIDERED THAT THE LANDLORD'S TREATMENT EFFORTS WERE REASONABLE, AND ACTIONS WERE PROMPT REASONABLE AND PROFESSIONAL. THE FACT TENANT WAS NOT PREPARED FOR THE SCHEDULED TREATMENT WAS A MAJOR DETERMINING FACTOR IN THIS. HOWEVER, THE FACT OF THE EXISTENCE OF THESE PEST INFESTATIONS AND LANDLORD ONLY ACTING ON TENANT REQUESTS PAINTS QUITE A DIFFERENT PICTURE AS WELL AS VERY LOW QUALITY OF RESPONSE TO MOUSE ISSUES. |                                                                                                                                    |    | 0   | F  |     |  |
|    |       |      | SCORE        |    |    |                                                                                               |                                                                              | 1                                                                                                                                                                                                                                                                                                                                                                                                                                                                                                                                                     | 1                                                                                                                                                  | -1                                                                                                                                                                                          |     |                                  |                                                                    |     | 0                                                             | 0                                                                        | -1                                                                                                                                                                                                                                                  |                                                                                                                                                                                                                                                                                                                                                                                                                                                 |                                                                                                                                    |    |     |    |     |  |
