# Supplementary material for: Analysis of 44 Cases before the Landlord and Tenant Board Involving Bed Bug Infestations in Ontario, Canada: Focus on Adjudicator Decisions Based on Entomological/Pest Management Evidence and Accountability under the Residential Tenancy Act and Other Applicable Legislation
Source: Insects. 2011 Jul 19;2(3):343–53. doi: 10.3390/insects2030343 (PMC4553548; doi:10.3390/insects2030343)
Supplement: Supplementary File 1 [file insects-02-00343-s001.zip]

Archive with 50 entries (49 files):
- supplementary-2/
- supplementary-2/2007.EAT00054.pdf
- supplementary-2/2008canlii01714.pdf
- supplementary-2/2008canlii86704.pdf
- supplementary-2/2009canlii01497.pdf
- supplementary-2/2009canlii01714.pdf
- supplementary-2/2009canlii067622.pdf
- supplementary-2/2009canlii19858.pdf
- supplementary-2/2009canlii78053.pdf
- supplementary-2/2009canlii78485.pdf
- supplementary-2/2009canlii79045.pdf
- supplementary-2/2009canlii79941.pdf
- supplementary-2/2009canlii80648.pdf
- supplementary-2/2010canlii12124.pdf
- supplementary-2/2010canlii13731.pdf
- supplementary-2/2010canlii13735.pdf
- supplementary-2/2010canlii13782.pdf
- supplementary-2/2010canlii13809.pdf
- supplementary-2/2010canlii18631.pdf
- supplementary-2/2010canlii37684.pdf
- supplementary-2/2010canlii37735.pdf
- supplementary-2/2010canlii37783.pdf
- supplementary-2/2010canlii44231.pdf
- supplementary-2/2010canlii44277.pdf
- supplementary-2/2010canlii48718.pdf
- supplementary-2/2010canlii48769.pdf
- supplementary-2/2010canlii48882.pdf
- supplementary-2/2010canlii58936.pdf
- supplementary-2/2010canlii58958.pdf
- supplementary-2/2010canlii65536.pdf
- supplementary-2/2010canlii65642.pdf
- supplementary-2/2010canlii67614.pdf
- supplementary-2/2010canlii67625.pdf
- supplementary-2/2010canlii76098.pdf
- supplementary-2/2010canlii76210.pdf
- supplementary-2/2010canlii76235.pdf
- supplementary-2/2010canlii79677.pdf
- supplementary-2/2010canlii93933.pdf
- supplementary-2/2011canlii13390.pdf
- supplementary-2/2011canlii13393.pdf
- supplementary-2/2011canlii13413.pdf
- supplementary-2/2011canlii13438.pdf
- supplementary-2/2011canlii13481.pdf
- supplementary-2/2011canlii26964.pdf
- supplementary-2/2011canlii27139.pdf
- supplementary-2/2011canlii27370.pdf
- supplementary-2/2011canlii34410.pdf
- supplementary-2/2011canlii5939.pdf
- supplementary-2/2011canlii5965.pdf
- supplementary-2/APPENDIX.2 ANALYSIS.CASES.pdf
